# Supplementary material for: Preferential immobilization of size-controlled anatase nanoparticles in mesopores
Source: Royal Society of Chemistry journal article supplement (doi:10.1039/c9cc03816g), 2019-01-01
Supplement: c9cc03816g1.pdf [file c9cc03816g1.pdf]

## Supporting information

### Experimental

**The preparation of SBA-15.** SBA-15 was synthesized by the report method.<sup>1</sup> 4.0 g of Pluronic P123 was dissolved in 30 g of deionized water and 120 g of 2M hydrochloric acid aqueous solution under magnetic stirring at 35°C. Then, 8.5 g of tetraethyl orthosilicate was added into the solution under magnetic stirring at 35°C and the stirring was continued for 20 hours. Then, the mixture was aged at 100°C for 1 day without stirring. The solid product was collected by centrifugation at 4,000 rpm for 15 minutes, washed with the deionized water, and air-dried at 25°C. The sample was calcined in air by slow heating from 25 to 500°C for 8 hours and kept at 500°C for 6 hours to remove P123 completely.

### Characterization

The low-angle and the wide-angle powder X-ray diffraction patterns (XRD) of the products were recorded using Bruker New D8 Advance equipped with monochromatic Cu K $\alpha$  radiation. UV-vis absorption spectra were recorded on a Hitachi U2900 spectrophotometer (Hitachi, Japan). The photoluminescence spectra were recorded on a fluorescence spectrophotometer (FLS980, Edinburgh Instruments, England) with the excitation at 370 nm. N<sub>2</sub> adsorption/desorption isotherms were obtained at -196°C on a Belsorp Mini instrument (MicrotracBEL Corp). Prior to the measurement, the samples were dehydrated at 120°C under vacuum for 2 hours. The surface area was calculated by the Brunauer–Emmett–Teller (BET) method using a linear plot in the range of P/P0=0.05–0.20.<sup>2</sup> Pore size distributions were derived from the N<sub>2</sub> adsorption isotherm by the Barrett–Joyner–Halenda (BJH) method.<sup>3</sup> The composition was derived on a wavelength-dispersive X-ray fluorescence spectrometer (XRF, Bruker S8 Tiger). SEM images were obtained on a JEOL JSM-7610F SEM. Prior to the measurements, the samples were coated with a platinum layer (4 nm). TEM images were obtained on a JEOL JEM 2100 FEG TEM/STEM operated at 200 kV. Elemental mapping was obtained by TEM equipped with EDS (Oxford) and EELS/GIF (Gatan) systems. FIB/SEM (Tescan, GAIA) and ultramicrotome (Reichert Ultracut E) with a DiATOME diamond knife were used to prepare the TEM specimen by cutting the hybrids particles parallelly and vertically to the pore channel of SBA-15.

## Results:

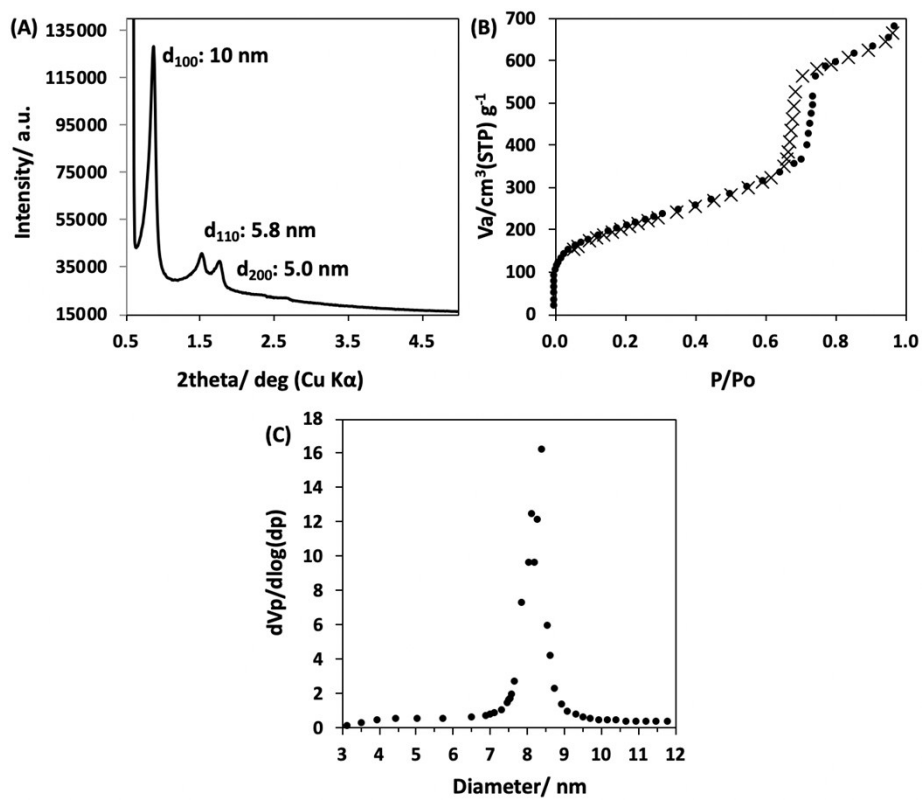

Figure S1. (A) Low angle X-ray powder diffraction of SBA-15. (B) N<sub>2</sub> adsorption (•) /desorption (×) isotherms and (C) BJH pore size distribution, derived from the N<sub>2</sub> adsorption isotherm, of SBA-15.

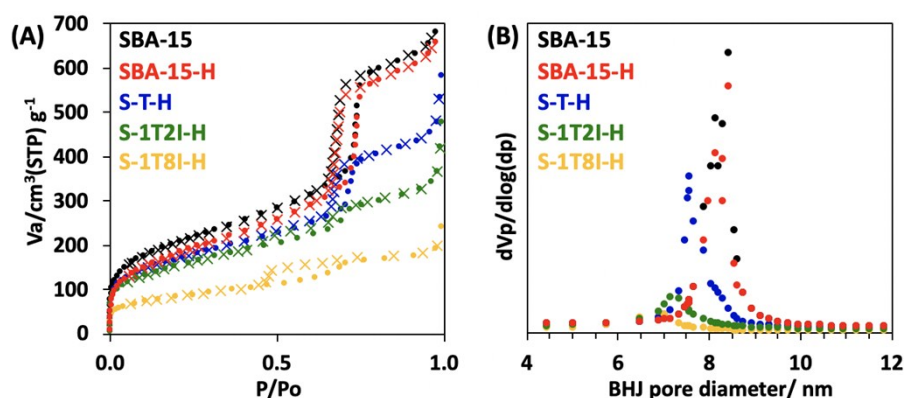

Figure S2. (A)  $\text{N}_2$  adsorption ( $\bullet$ ) /desorption ( $\times$ ) isotherms (B) and BJH pore size distribution (C), derived from the  $\text{N}_2$  adsorption isotherms, of SBA-15, SBA-15-H (SBA-15 was exposed in HCl vapor for 1 day and calcined at  $300^\circ\text{C}$  in air), S-T-H, S-1T2I-H and S-1T8I-H.

Table S1. The summary of the porosities and the  $\text{TiO}_2$  content of SBA-15, SBA-15-H, S-T-H, S-1T2I-H and S-1T8I-H.

| Samples  | $S_{\text{BET}}$ ( $\text{m}^2/\text{g}$ ) | $V_{\text{PORE}}$ ( $\text{cm}^3/\text{g}$ ) | $D_{\text{BJH}}$ (nm) | $\text{TiO}_2$ content* (mass%) |
|----------|--------------------------------------------|----------------------------------------------|-----------------------|---------------------------------|
| SBA-15   | 644                                        | 1.35                                         | 8.0                   | -                               |
| SBA-15-H | 634                                        | 1.33                                         | 8.0                   | -                               |
| S-T-H    | 290                                        | 0.36 (0.95)**                                | Broad                 | 64                              |
| S-1T2I-H | 508                                        | 0.63 (1.09)**                                | 7.0                   | 42                              |
| S-1T8I-H | 575                                        | 0.88 (1.12)**                                | 7.5                   | 26                              |

\* $\text{TiO}_2$  contents were determined by XRF. \*\*The value in the parentheses is the pore volume of SBA-15–anatase ( $\text{cm}^3/\text{g}$  of silica), which was calculated from the pore volume of SBA-15–anatase ( $0.36 \text{ cm}^3/\text{g}$  of hybrid) and the  $\text{SiO}_2$  content (38 mass %) of the hybrid.

## References

- (1) D. Zhao, Q. Huo, J. Feng, B. F. Chmelka, G. D. Stucky, *J. Am. Chem. Soc.*, 1998, **120**, 6024.
- (2) S. Brunauer, P. H. Emmett, E. Teller, *J. Am. Chem. Soc.*, 1938, **60**, 309.
- (3) E. P. Barrett, L. G. Joyner, P. P. Halenda, *J. Am. Chem. Soc.*, 1951, **73**, 373.
